# Über den Einfluss des Wasserdruckes auf $pH$ und das Kohlensäuregleichgewicht in grösseren Meerestiefen.

Von

**Kurt Buch und Stina Gripenberg.**

Institut für Meeresforschung, Helsingfors.

Die Wasserstoffzahl des Meerwassers ( $pH$ ) wird, nach den Ergebnissen der neueren Untersuchungen über das Kohlensäuregleichgewicht im Meerwasser, fast ausschliesslich von der Kohlensäure und den Carbonaten des Wassers bestimmt. Die bisherigen Forschungen auf diesem Gebiet haben sich ausschliesslich auf das Studium des Gleichgewichtszustandes an der Oberfläche bezogen.

Der mögliche Einfluss von hohen Drucken, wie sie in den grösseren Meerestiefen vorhanden sind, ist nicht diskutiert worden, hauptsächlich wohl, weil keinerlei Anhaltspunkte zur Beurteilung dieses Faktors vorlagen. Nach den theoretischen und experimentellen Untersuchungen hauptsächlich von TAMMANN und seinen Mitarbeitern ist indessen bekannt, dass z. B. die Leitfähigkeit der Elektrolyte durch starke Erhöhung des Druckes stets mehr oder weniger verändert wird. Die Grösse der Beeinflussung ist von der Art des Elektrolyten abhängig. Die drei Haupttypen, starke, mittelstarke und schwache Elektrolyte, unterscheiden sich in dieser Hinsicht in markanter Weise von einander, sodass das Verhalten gegen Drucke gut zu ihrer Charakterisierung beiträgt.

Die schwachen Säuren verhalten sich, wie die experimentelle Erfahrung lehrt, in ziemlich gleichartiger Weise. — Die Leitfähigkeitsmessungen ermöglichen in bekannter Weise die Feststellung des Dissoziationsgrades der Säure. Aus der letzteren lässt sich die Dissoziationskonstante berechnen. Nach experimentellen Untersuchungen von E. BRANDER ändern sich die Dissoziationskonstanten verschiedener Säuren, besonders derjenigen, die einander in Bezug auf Atom-Anzahl und -Bau ähnlich sind, mit ungefähr gleichen Beträgen, sodass die Druckfaktoren

einer Säure annähernd auch die Druckfaktoren anderer Säuren vertreten können. Als Beispiel mögen BRANDERS Druckkoeffizienten für Essigsäure und Fumarsäure (erste Diss. Stufe) für den Druck von 1000 kg pro cm<sup>2</sup> angeführt werden, welcher Druck ungefähr den höchsten im Meere vorhandenen (in der Tiefe von etwa 10000 Metern) repräsentiert. BRANDER berechnet nämlich aus Leitfähigkeitsmessungen von TAMMANN den Druckkoeffizienten  $K(p)/K(1)$ , welcher die Zahl bezeichnet, mit welcher die Dissoziationskonstante der Säure bei Atmosphärendruck multipliziert werden muss, um die Konstante beim Drucke  $p(\text{kg/cm}^2)$  wiederzugeben, für Essigsäure zu 1.53 und für Fumarsäure zu 1.47.

Tabelle 1.

| $(p)$<br>kg/cm <sup>2</sup> | $K(p)/K(1)$<br>Kohlensäure, erste Diss.-Stufe |                              | $K(p)/K(1)$<br>Essigsäure.<br>Verdünnung<br>10/L Mol |
|-----------------------------|-----------------------------------------------|------------------------------|------------------------------------------------------|
|                             | Verdünnung I<br>24.45 L/Mol                   | Verdünnung II<br>58.43 L/Mol |                                                      |
| 1                           | 1.000                                         | 1.000                        | 1.000                                                |
| 500                         | 1.738                                         | 1.733                        | 1.240                                                |
| 1000                        | 2.940                                         | 2.935                        | 1.530                                                |
| 1500                        | 4.822                                         | 4.817                        | 1.847                                                |
| 2000                        | 7.724                                         | 7.710                        | 2.186                                                |
| 2500                        | 12.18                                         | 12.19                        | 2.567                                                |
| 3000                        | 18.76                                         | 18.68                        | 2.898                                                |

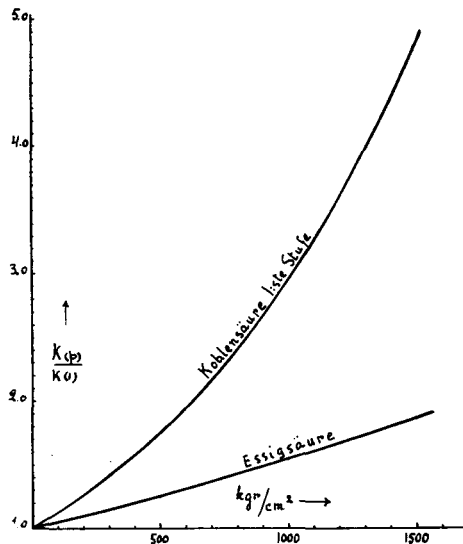

Fig. 1. Graphische Darstellung des Verlaufs des Druckkoeffizienten für beide Säuren.

Das Verhalten der Kohlensäure weicht indessen in dieser Hinsicht von den übrigen Säuren in beträchtlichem Masse ab, indem die erste Dissoziationskonstante (die scheinbare Konstante, wo sowohl die unhydratisierten Moleküle  $CO_2$  wie die hydratisierten  $H_2CO_3$  mit einbezogen sind) mit dem Drucke bedeutend mehr zunimmt als die Konstanten der anderen Säuren —, wie die in voranstehender Tabelle 1 zusammengestellten Zahlen von BRANDER ergeben, denen zum Vergleich auch die Werte für Essigsäure beigelegt sind. BRANDER's Messungen an Kohlensäure wurden in zwei verschiedenen Verdünnungen ausgeführt, welche ergeben, dass die Druckkoeffizienten von der Verdünnung unabhängig sind.

BRANDER hat auch die Ursache für das abnorme Verhalten der Kohlensäure nachgewiesen. Es ist darauf zurückzuführen, dass bei der Ionenbildung

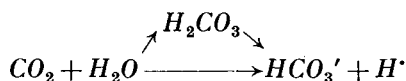

ein Molekül Wasser verschwindet, wodurch das Volumen der Lösung vermindert wird. Erhöhter Druck muss also den Ionenbildungsvorgang begünstigen.

Die Werte der Tabelle 1 bilden die Unterlage für die folgenden Berechnungen des Druckeinflusses auf das Gleichgewichtssystem der Kohlensäure in den grösseren Meerestiefen. Hierfür ist in Meerwasser massgebend sowohl die erste wie die zweite Konstante der Kohlensäure. BRANDER's Messungen, vorgenommen an Lösungen von Kohlendioxyd in Wasser, beziehen sich naturgemäss nur auf die erste Konstante. Die zweite kommt in dem sauren Milieu, bei welchem die Messungen stattfanden, nicht in Betracht. Im alkalischen Milieu des Meerwassers ist sie jedoch zu beachten. Da der Einfluss, den der Druck auf sie ausübt, indessen nicht bekannt ist, sind wir gezwungen, die Werte einer anderen ähnlichen u. zw. einer einbasischen Säure zu benutzen, indem wir das  $HCO_3'$ -Ion, welches normal dissoziiert, als einbasische Säure betrachten. Von den bisher in Bezug auf den Druck untersuchten Säuren kommt die Essigsäure ihrer Konstitution nach am nächsten in Betracht. Über die Grösse der hierdurch entstehenden Unsicherheit gibt die oben erwähnte Differenz der Druckkoeffizienten der Essigsäure und Fumarsäure (für den selten vorkommenden Maximaldruck 1000 kg/cm<sub>2</sub>) Auskunft. Logarithmiert beträgt sie nur 0.01 Einheiten des Logarithmus der Dissoziationskonstante. Da  $HCO_3'$  der Essigsäure ähnlicher ist, können wir hier nur eine kleinere Differenz erwarten, die wir vernachlässigen können. Da uns in erster Linie die Gleichgewichtslage des  $CO_2$ -Systemes in bestimmten Meerestiefen interessiert, haben wir unter

Anwendung der »Tabellen für Meerwasser unter Druck« von V. WALFRID EKMAN die obige Tabelle von BRANDER auf die Meerestiefen in Metern (bei  $Cl = 19.5 \text{ ‰}$  und einer mittleren Temperatur der Wassersäule von  $t = 5^\circ$ ) umgerechnet, wo die von BRANDER angegebenen Drucke herrschen, und dann für zwischenliegende Tiefen interpoliert. Die Druckkoeffizienten geben wir in Form ihrer Logarithmen  $\Delta pK$  an. Die Tabelle 2 enthält die so erhaltenen Werte von  $\Delta pK_1$  (erste Konstante) bzw.  $\Delta pK_2$  (zweite Konstante), welche von den für Atmosphärendruck gültigen  $pK$ -Werten abzuziehen sind, um für die nebenbei angegebenen Tiefen zu gelten.

Die in der Tabelle 2 angegebenen Werte können wir nun zur Berechnung der Verschiebung des  $CO_2$ -Gleichgewichtes mit zunehmender Tiefe verwenden. Diese Berechnung gründet sich wie diejenige des Gleichgewichtes im Oberflächenwasser auf die beiden Massenwirkungsgleichungen für die erste und zweite Dissoziationsstufe der Kohlensäure, wobei wir die für die Oberfläche gültigen Werte der Konstanten mit denjenigen für die betreffende Tiefe ersetzen. Die Berechnungsweise für die Oberfläche ist früher von BUCH (3) entwickelt.

Tabelle 2.  
Einfluss des Wasserdruckes in verschiedenen Tiefen auf  $pK_1$  und  $pK_2$ .

| $\Delta pK_1$ | Tiefe in M. | $\Delta pK_1$ | Tiefe in M. | $\Delta pK_2$ | Tiefe in M. |
|---------------|-------------|---------------|-------------|---------------|-------------|
| — 0.02        | 400         | — 0.26        | 5300        | — 0.02        | 1100        |
| .04           | 800         | .28           | 5700        | .04           | 2100        |
| .06           | 1200        | .30           | 6100        | .06           | 3200        |
| .08           | 1600        | .32           | 6500        | .08           | 4200        |
| .10           | 2000        | .34           | 6900        | .10           | 5300        |
| .12           | 2400        | .36           | 7300        | .12           | 6300        |
| .14           | 2800        | .38           | 7800        | .14           | 7400        |
| .16           | 3200        | .40           | 8200        | .16           | 8400        |
| .18           | 3700        | .42           | 8600        | .18           | 9500        |
| .20           | 4100        | .44           | 9100        |               |             |
| .22           | 4500        | .46           | 9500        |               |             |
| .24           | 4900        | .48           | 10000       |               |             |

Die Gleichungen lauten:

$$1) \quad \frac{a_{H^+} \cdot c_{HCO_3'}}{c_{CO_2}} = K_{c_1} \text{ } ^1)$$

$$2) \quad \frac{a_{H^+} \cdot c_{CO_3''}}{c_{HCO_3'}} = K_2'$$

<sup>1)</sup> Die durch Gl. 1) definierte Konstante wird  $K_{c_1}$  statt  $K_1'$  genannt, um die

$a_H$  bedeutet die Wasserstoffionenaktivität, deren negativer Logarithmus konventionell durch die von S. P. L. SÖRENSEN definierte Grösse  $pH$  wiedergegeben ist.  $c_{HCO_3'}$ ,  $c_{CO_3''}$  und  $c_{CO_2}$  sind die Konzentrationen, in Molen  $CO_2$  pro Liter, der durch das Index bezeichneten Molekül- bzw. Ionenarten. ( $c_{CO_2}$  = Summe der hydratisierten,  $H_2CO_3$ -, und unhydratisierten  $CO_2$ -Moleküle).

Die Dissoziationskonstanten  $K_{c_1}$  und  $K_2'$  variieren mit der Temperatur, dem Salzgehalte und dem Drucke.

Der Einfluss der beiden ersten Faktoren ist ausführlich in einer demnächst erscheinenden Arbeit von BUCH, HARVEY, WATTENBERG und GRIPENBERG (4) behandelt und in Tabellen für Atmosphärendruck wiedergegeben. Um für die Tiefe gültige Konstanten zu erhalten, haben wir an den Oberflächenwerten, oder richtiger an deren negativen Logarithmen  $pK_{c_1}$  bzw.  $pK_2'$  die Korrekturen  $\Delta pK$  der Tabelle 2 anzubringen. Da die Gleichungen vier Unbekannte enthalten, benötigen wir noch folgender zwei, von BUCH<sup>1)</sup> benutzten Gleichungen, welche die Beziehung zwischen den Kohlensäurekonstituenten und den analytisch ermittelbaren Grössen, Titrationsalkalinität und Totalkohlensäure darstellen:

Bezeichnungsweise in einer demnächst erscheinenden Arbeit »Über das Kohlensäuresystem im Meerwasser« von BUCH, HARVEY, WATTENBERG und GRIPENBERG zu benutzen. Die Bezeichnung  $K_1'$  wird in dieser Arbeit für die durch die Gleichung

$$\frac{a_H \cdot c_{HCO_3'}}{a_{CO_2} \cdot a_{H_2O}} = K_1'$$

gegebene Konstante angewandt. Für  $a_{CO_2}$  (Aktivität der freien Kohlensäure) und  $a_{H_2O}$  (Aktivität des Wassers) gelten aber

$$a_{CO_2} = c_{CO_2} \cdot \frac{c_0}{c_S}$$

$$a_{H_2O} = \frac{p}{p_0}$$

wo  $c_0$  und  $c_S$  die Löslichkeiten der Kohlensäure in reinem Wasser und in Wasser vom Salzgehalt  $S$ ,  $p_0$  und  $p$  die Dampfdrucke des reinen Wassers und Wassers vom Salzgehalt  $S$  bedeuten. Die oben definierte Konstante  $K_{c_1}$  ist somit mit der Konstante  $K_1'$  durch die Beziehung

$$K_{c_1} = K_1' \cdot \frac{c_0}{c_S} \cdot \frac{p}{p_0}$$

verbunden. Tabellen die  $K_1'$ ,  $K_{c_1}$ ,  $c_0$  und  $c_S$  sowie  $\frac{p}{p_0}$  enthalten, sind in der erwähnten Arbeit gegeben.

<sup>1)</sup> Dissertation Seite 77. Kohlensäurefaktoren, Seite 57.

$$3) \quad \text{Titr.-Alkalinität} = c_{\text{HCO}_3'} + 2c_{\text{CO}_3''}$$

$$4) \quad \text{Totalkohlensäure } (c_{\Sigma\text{CO}_2}) = c_{\text{CO}_2} + c_{\text{HCO}_3'} + c_{\text{CO}_3''}$$

Die Gleichungen 1), 2), 3) ergeben

$$5) \quad c_{\text{HCO}_3'} = \frac{\text{Titr.-Alk.}}{1 + \frac{2K_2'}{a_{\text{H}}}}$$

$$6) \quad c_{\text{CO}_3''} = \frac{\text{Titr.-Alk.}}{1 + \frac{2K_2'}{a_{\text{H}}}} \cdot \frac{K_2'}{a_{\text{H}}}$$

$$7) \quad c_{\text{CO}_2} = \frac{\text{Titr.-Alk.}}{1 + \frac{2K_2'}{a_{\text{H}}}} \cdot \frac{a_{\text{H}}}{K_{c_1}}$$

Die für  $c_{\text{CO}_2}$ ,  $c_{\text{HCO}_3'}$  und  $c_{\text{CO}_3''}$  erhaltenen Ausdrücke in Gl. 4) eingesetzt ergeben:

$$8) \quad c_{\Sigma\text{CO}_2} = \frac{\text{Titr.-Alk.}}{1 + \frac{2K_2'}{a_{\text{H}}}} \left( 1 + \frac{K_2'}{a_{\text{H}}} + \frac{a_{\text{H}}}{K_{c_1}} \right)$$

Wir sind indessen noch keineswegs berechtigt, die Gleichungen 5), 6), 7) und 8) nach Einführung der Tiefenkorrektur von  $K_{c_1}$  und  $K_2'$  direkt zur Berechnung der bzw. links angeführten Grössen anzuwenden, denn wir operieren hier mit Grössen, Titr.-Alk. und  $a_{\text{H}}$  bzw.  $pH$ , die analytisch nur im Oberflächenzustand ermittelt werden können. Wir haben daher zuerst die Abhängigkeit des  $pH$  vom Drucke zu untersuchen. Quantitativ besagt die Vergrößerung von  $K_1$  bzw.  $K_2$  bei zunehmendem Drucke, dass das Wasser saurer wird. Die an einer aus der Tiefe geschöpften Wasserprobe ausgeführte  $pH$ -Bestimmung gibt einen alkalischeren Wert als das Wasser in der Tiefe besass. Der quantitative Zusammenhang ergibt sich z. B. aus der Gl. 8), wenn wir dieselbe in Bezug auf  $a_{\text{H}}$  auflösen<sup>1)</sup>. Am einfachsten geschieht dies indem wir die Titr.-Alk. auf die linke Seite überführen und

$$9) \quad \frac{c_{\Sigma\text{CO}_2}}{\text{Titr.-Alk.}} = A$$

<sup>1)</sup> Vergl. auch Dissertation von BUCH Gl. 10) Seite 77.

setzen. Gl. 8) in reduzierter Form lautet dann:

$$10) \quad a_H^2 - K_{c_1}(A - 1)a_H - K_{c_1}K_2'(2A - 1) = 0.$$

Die Anwendbarkeit dieser Gleichung auch für die Tiefe gründet sich auf die Tatsache, dass  $\Sigma CO_2$  und Titr.-Alk. einer aus der Tiefe zur Oberfläche gebrachten Wasserprobe von der Gleichgewichtsverschiebung, die bei Aufhebung des Druckes eintritt, unberührt bleiben. Die einzige Veränderung an diesen Grössen ist diejenige, welche von der Volumenvergrößerung des Wassers bedingt ist. Das Verhältnis beider bleibt aber dabei naturgemäss unverändert.

Die Tiefenkorrektur  $\Delta pH$  können wir daher einfach in folgender Weise berechnen. Wir lösen die Gleichung 8) bzw. 10) zweimal auf. Zuerst in Bezug auf die Grösse  $A$  ausgehend von einem gegebenen  $pH$ , und von den Oberflächenwerten der Konstanten  $K_{c_1}$  und  $K_2'$ , und sodann in Bezug auf  $pH$  unter Anwendung des erhaltenen  $A$ -Wertes und der für die betrachtete Tiefe gültigen  $K_{c_1}$  und  $K_2'$ .  $\Delta pH$  ist die Differenz des Oberflächen- und Tiefenwertes.

Der Wert von  $\Delta pH$  ist von verschiedenen Faktoren abhängig, in erster Linie von  $pH$  selbst. Aus den Gleichungen 1) und 2) ersehen wir, dass  $\Delta pH$  in saurerem Wasser grösser sein muss als in alkalischerem. Für den Fall z. B., dass  $c_{HCO_3'} = c_{CO_2}$ , d. h.  $a_H = K_{c_1}$  ist, wird  $\Delta pH$  numerisch praktisch denselben Wert wie  $\Delta pK_1$  haben. Dies trifft z. B. zu für ein Wasser von  $20^\circ$  und  $Cl = 19.5 \text{ ‰}$  für  $pH = 6.02$ . Falls wieder  $c_{CO_3''} = c_{HCO_3'}$  (im selben Wasser von  $20^\circ$  und  $19.5 \text{ ‰}$  bei  $pH = pK_2' = 8.75$ ) ist  $\Delta pH$  wiederum praktisch identisch mit  $\Delta pK_2$ . Für zwischenliegende Werte geht  $\Delta pH$  kontinuierlich aber nicht linear vom einen Wert zum anderen über.

Fig. 2 stellt den Verlauf von  $\Delta pH$  bei einer Tiefe von 10,000 Meter mit  $pH$  Oberflächenwert dar, gültig für ein Wasser von  $19.5 \text{ ‰}$   $Cl$ -Gehalt und  $t = 0^\circ - 5^\circ$ .

Der Umkehrpunkt dieser Kurve liegt bei dem  $pH$ , wo  $c_{\Sigma CO_2} = \text{Titration-Alk.}$  d. h.  $A = 1$ , oder in den Gleichungen 1) bzw. 2)  $c_{CO_2} = c_{CO_3''}$  ist. Die Multiplikation dieser Gleichungen oder auch die Auflösung von Gl. 10) gibt uns die bekannte Gleichung

$$a_H = \sqrt{K_{c_1} \cdot K_2'}$$

woraus folgt

$$\Delta pH = 0.5 (\Delta pK_{c_1} + \Delta pK_2').$$

In 10,000 Meter Tiefe ist in diesem Falle  $\Delta pH = 0.5 (0.48 + 0.19) = 0.34$ .

Indessen variieren die Werte von  $K_{c_1}$  und  $K_2'$  mit der Temperatur und der Chlorzahl, woraus folgt, dass das  $pH$ , bei welchem die Grösse  $A$  den Wert 1 annimmt, auch mit diesen Faktoren variieren muss. Der Kurvenverlauf bleibt dabei unverändert, die ganze Kurve wird aber seitlich verschoben.

Wir haben also noch zu untersuchen, mit welchen Beträgen die in den Meerestiefen vorkommenden Variationen von  $t$  und  $Cl$  auf  $\Delta pH$

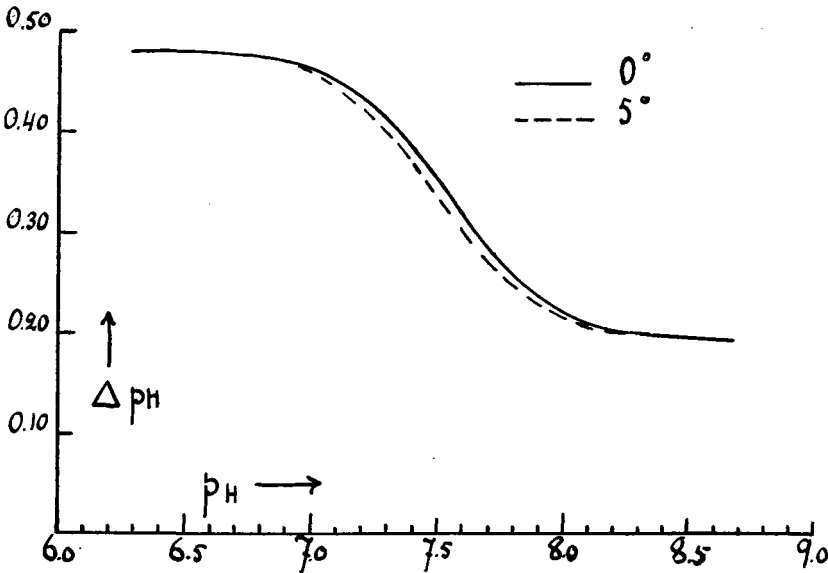

Fig. 2. Verlauf von  $\Delta pH$  bei einer Tiefe von 10.000 Metern mit  $pH$  an der Oberfläche, berechnet für ein Wasser von 19.5 ‰  $Cl$ -Gehalt und  $t = 0^\circ - 5^\circ$ .

einwirken. Wir können mit einer Variation der Temperatur zwischen  $0^\circ$  und  $5^\circ$ , sowie einer  $Cl$ -Variation zwischen 19 und 20 ‰ rechnen.

Eine Übersichtsrechnung ergab, dass sowohl der Temperatur- wie der Salzgehaltseinfluss praktisch vernachlässigt werden kann. Die grösstmögliche Änderung von  $\Delta pH$  von 0 bis  $5^\circ$ , nämlich in 10,000 Meter Tiefe und im sauersten Gebiet ( $pH = 7.5$ ), beträgt 0.02 Einheiten, bei Anwendung einer mittleren Temperatur von  $2.5^\circ$  also 0.01 Einheiten in jeder Richtung. Der Salzgehaltseinfluss ist noch geringer. Das Interpolationsdiagramm Fig. 3, zeigt, dass die Veränderung von  $pH$  linear mit der Tiefe verläuft. Die Doppellinien im saureren Gebiet gelten  $0^\circ$  und  $5^\circ$ . Die Salzgehaltsvariabilität ist graphisch nicht darstellbar. (Die Differenz in 10,000 Meter Tiefe bei  $pH = 7.5$  zwischen  $Cl = 19$  und 20 ist 0.01 Einheiten.)

Da die Kurven linear verlaufen, können wir das Resultat in folgender



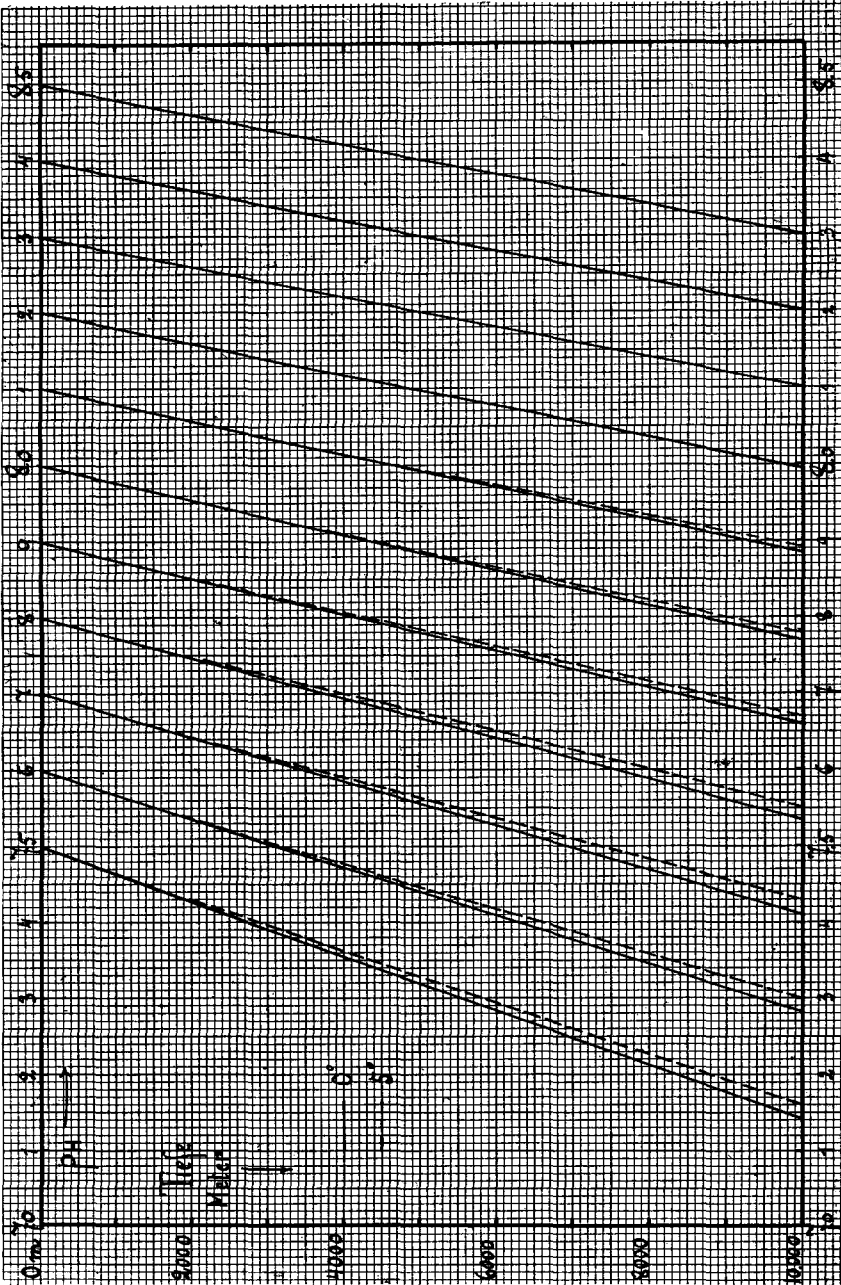

Fig. 3. Veränderung von  $P_H$  mit der Tiefe bei  $t = 0^\circ - 5^\circ$ , berechnet für ein Wasser von  $19.5 \text{ ‰ Cl-Gehalt}$ .

Tabelle 3 darstellen, welche die  $\Delta pH$ -Werte enthält, die pro 1000 Meter Tiefenzuwachs von den gemessenen (für den Oberflächenzustand gültigen)  $pH$  abzuziehen sind, oder

$$pH \text{ (Tiefe)} = pH \text{ (Oberfläche)} - \Delta pH \frac{\text{Tiefe}}{1000}.$$

Tabelle 3.

$Cl = 19.5 \text{ ‰}$   $t = 0^\circ - 5^\circ$

| $pH$ Oberfläche          | 7.5   | 7.6   | 7.7   | 7.8   | 7.9   | 8.0   | 8.1   | 8.2   | 8.3   | 8.4   | 8.5   |
|--------------------------|-------|-------|-------|-------|-------|-------|-------|-------|-------|-------|-------|
| $\Delta pH$ (pro 1000 M) | 0.035 | 0.031 | 0.028 | 0.025 | 0.023 | 0.022 | 0.021 | 0.020 | 0.020 | 0.020 | 0.020 |

Nachdem uns die Feststellung von  $pH$  in der Tiefe möglich ist, können wir die Kohlensäurekonstituenten mit Hilfe der Gleichungen 5), 6) und 7) berechnen, in welche die Tiefenwerte von  $a_H$ ,  $K_c$ ,  $K_2'$  und Titr.-Alk. eingesetzt sind.

Die Tiefenwerte der Titr.-Alk. und Totalkohlensäure sind, wie erwähnt, nur um den Betrag der Kompression des Wassers grösser als die für den Oberflächenzustand gültigen. Wir erhalten sie durch Multiplikation des Oberflächenwertes mit dem Verhältnis der spez. Gewichte  $s_m/s_0$  des Wassers in 0 und  $m$  Metern, dessen Werte in folgender kleinen Tabelle für verschiedene Tiefen angeführt sind.

Tabelle 4.

|                      |       |       |       |       |
|----------------------|-------|-------|-------|-------|
| $s_m/s_0$ .....      | 1.010 | 1.020 | 1.030 | 1.040 |
| Tiefe in Metern .... | 2200  | 4700  | 7300  | 9800  |

In der erwähnten Arbeit von BUCH, HARVEY, WATTENBERG, GRIPENBERG sind teils Anweisungen zur Berechnung, teils Tabellen und ein Interpolationsdiagramm zur direkten Entnahme der Kohlensäurekonstituenten für Wasser im Oberflächenzustande gegeben. Für Wasser in der Tiefe werden dort auch die wichtigsten Resultate der vorliegenden Untersuchung angeführt.

Um eine Vorstellung davon zu geben, mit welchen Beträgen sich die verschiedenen Kohlensäurekonstituenten bei zunehmender Tiefe ändern, haben wir dieselben für zwei Oberflächenwerte des  $pH$  7.6 und 8.0 eines Wassers von  $t = 0^\circ$ ,  $Cl = 19.5 \text{ ‰}$  und Titr.-Alk. = 2.40 m Äqv/L berechnet. (Tabelle 5.) Die Konzentrationen sind in Millimolen pro Liter angegeben.

Wie ersichtlich ist die Veränderung in  $pH$  recht bedeutend, besonders

Tabelle 5.  
 $t = 0^\circ$   $Cl = 19.5 \text{ ‰}$

| Tiefe<br>Meter | $pH$ | Tit.-Alk. | $c_{\Sigma CO_2}$ | $c_{CO_2}$ | $c_{HCO_3'}$ | $c_{CO_3''}$ |
|----------------|------|-----------|-------------------|------------|--------------|--------------|
| 0              | 8.00 | 2.40      | 2.23              | 0.026      | 2.00         | 0.20         |
| 5000           | 7.89 | 2.45      | 2.27              | 0.020      | 2.05         | 0.20         |
| 10000          | 7.78 | 2.50      | 2.31              | 0.015      | 2.09         | 0.20         |
| 0              | 7.60 | 2.40      | 2.38              | 0.074      | 2.22         | 0.09         |
| 5000           | 7.44 | 2.45      | 2.43              | 0.063      | 2.29         | 0.08         |
| 10000          | 7.27 | 2.50      | 2.48              | 0.052      | 2.36         | 0.07         |

bei niedrigem  $pH$ . Diese Tatsache spielt für die Beurteilung der Kalklöslichkeit in den grossen Tiefen eine wesentliche Rolle. Hand in Hand damit geht ein Abnehmen mit der Tiefe der Konzentrationen der freien Kohlensäure und der Karbonationen, sowie ein Steigen derjenigen der Bikarbonationen. Die kleinste Veränderung erfahren jedoch die Karbonationen, deren Konzentration wenn  $pH > 8$  in allen Tiefen praktisch dieselbe ist.

#### Summary.

Until now the carbonic acid equilibrium of sea-water has been studied only for surface conditions. An investigation by E. BRANDER of the influence of high pressures on the dissociation constants of carbonic acid renders it possible to calculate  $pH$  and the various carbonic acid constituents *in situ* at great depths. BRANDER's results are given in Table 1 and Fig. 1, showing the factors to be applied to the dissociation constants at normal pressure to give those at higher pressures. The second dissociation step, the dissociation of the bicarbonate ion, has not been studied, but as all weak acids behave very similarly, the values for acetic acid can be used. The values in Table 1 have been recalculated by the authors and entered in Table 2, giving the depths in metres and the corresponding amounts to be subtracted from  $pK_1$  and  $pK_2$ , the negative logarithms of the constants. Equations 1), 2), 3) and 4) determine the equilibrium of a water sample at any temperature, salinity or depth when the proper values for  $Kc_1$  and  $K_2'$  are used. The influence of salinity and temperature is discussed in detail in a shortly to be published paper by BUCH, HARVEY, WATTENBERG and GRIPENBERG. Equation 8) gives total  $CO_2$  expressed in terms of  $pH$ , alkali reserve,  $K_c$  and  $K_2'$ . Equation 10) is the same in reduced form, where  $A = \frac{c_{\Sigma CO_2}}{\text{alkali reserve}}$ . The

equilibrium of a water sample brought up to the surface from a great depth will be displaced as the pressure diminishes; this, however, will not affect the total  $CO_2$  nor the alkali reserve. The only change which these quantities undergo is that caused by the increase in volume of the water sample. The quantity  $A$  will remain quite unchanged. This enables us to calculate the change in  $pH$ . From equation 10) the quantity  $A$  is calculated for a given  $pH$  at the surface using the surface values for  $K_{c_1}$  and  $K_2'$  (to be found in the above mentioned paper by BUCH and co-workers). With this value of  $A$  and those of  $K_{c_1}$  and  $K_2'$  for the depth in consideration the same equation gives  $pH$  at this depth. The difference,  $\Delta pH$ , between  $pH$  at the surface and at a given depth varies with  $pH$ . Fig. 2 shows the variation, at a depth of 10,000 metres, of  $\Delta pH$  with  $pH$  at the surface, calculated for a water of 19.5‰  $Cl$  and the temperatures  $0^\circ$  and  $5^\circ$ . At low  $pH$  values ( $< 6.5$ )  $\Delta pH$  is equal to  $\Delta pK_1$ ; at high values ( $> 8.5$ ) it equals  $\Delta pK_2$ . Fig. 3 gives the variation of  $pH$  with depth for the same water. The variation from  $0^\circ$  to  $5^\circ$  at  $pH$  7.5 is only 0.02; the salinity influence is still less, for at  $pH$  7.5 the difference between  $\Delta pH$  at  $Cl$  19‰ and 20‰ only amounts to 0.01. Table 3 gives the values of  $\Delta pH$  to be subtracted from the surface  $pH$  for an increase in depth of 1,000 metres. When  $pH$  at the depth is known,  $c_{CO_2}$ ,  $c_{HCO_3}$  and  $c_{CO_3}$  can be calculated from equations 5), 6) and 7). For the alkali reserve the value *in situ* should be used. This is found by means of Table 4, which gives the relation  $s_m/s_0$  at various depths between the specific gravities of a water (19.5‰  $Cl$ , mean temp. of the water column  $5^\circ$ ) at  $m$  and 0 metres. In Table 5 the calculation outlined above is carried out for a water of  $Cl$  19.5‰,  $t$   $0^\circ$ , alkali reserve 2.40 milli-eq./litre and  $pH$  7.6 and 8.0 at the surface. The concentrations of the carbonic acid constituents at 5,000 and 10,000 metres are given. The table shows that the change in  $pH$  with depth is considerable, especially in the case of the acid water. This fact should be taken into account in discussing the solubility of calcium carbonate in deep waters. With increasing depth there is, moreover, a notable rise in the concentration of the bicarbonate ions, but a decrease of the free carbon dioxide and of the carbonate ions. The latter undergo the least change, as above  $pH$  8 the carbonate ion concentration is practically the same at all depths.

**Literatur.**

1. BRANDER, EINAR. Der Einfluss des Druckes auf das Leitvermögen der Elektrolyte. Societas Scientiarum Fennica. Comment Phys. Mat. VI 8. 1932.
  2. BUCH, K. Über die Alkalinität, Wasserstoffionenkonzentration, Kohlensäure und Kohlensäuretenion im Wasser der Finnland umgebenden Meere. Finnländische hydrographisch-biologische Untersuchungen Nr. 14. Helsingfors 1917. Dissertation.
  3. BUCH, KURT. Die Kohlensäurefaktoren des Meerwassers I und II. Rapports et Procès-Verbaux des Réunions du Conseil Perm. Intern. p. l'Exploration de la Mer. Vol. LXVII. 1930. S. 51—88.
  4. BUCH, K., HARVEY, H. W., WATTENBERG, H., GRIPENBERG, S. Über das Kohlen-säuresystem im Meerwasser. Bericht über die im Frühjahr 1931 in Helsingfors von einer Arbeitskommission der Internationalen Meeresforschung ausgeführten Untersuchungen. Redigiert von KURT BUCH. Rapports et Procès-Verbaux des Réunions du Cons. Perm. Intern. p. l'Exploration de la Mer. Vol. LXXIX.
  5. EKMAN, V. WALFRID. Tabellen für Meerwasser unter Druck. Cons. Perm. Intern. p. l'Exploration de la Mer. Publication de Circonstance Nr. 49. Copenhagen 1910.
  6. TAMMANN, G. und TOFAUTE, W. Einfluss des Druckes auf das Leitvermögen von Säurelösungen. Zeitschr. anorg. Ch. 182 S. 353—381 (1929). Dasselbst auch Hin-weise auf ältere Literatur.
-
